# Supplementary material for: Selective identification of p-nitroaniline by bromine-mediated polarization of carbon dots
Source: Royal Society of Chemistry journal article supplement (doi:10.1039/d3an02080k), 2023-12-28
Supplement: d3an02080k1.pdf [file d3an02080k1.pdf]

## Supporting Information

For

### Selective identification of *p*-nitroaniline by bromine-mediated polarization of carbon dots

Feng Li,<sup>†</sup> Kai-Qi Liu,<sup>†</sup> Wen-Juan Wang,\* Zhen-Tao Jiang, Fen-Ying Kong, Heng-Ye Li, Zhong-Xia Wang\* and Wei Wang\*

School of Chemistry and Chemical Engineering, Yancheng Institute of Technology, Yancheng 224051, China.

\*Corresponding authors

E-mail: wangwenjuan-1984@163.com

wangzx198411@163.com

wangw@ycit.edu.cn

## Supplementary materials

**Table S1** Table summarizing surface atomic ratios of single BBCNs and BBCNs/PNA.

| Name        | Atomic % |           |
|-------------|----------|-----------|
|             | BBCNs    | BBCNs/PNA |
| <b>Br3d</b> | 6.52     | 6.44      |
| <b>O1s</b>  | 10.74    | 9.54      |
| <b>C1s</b>  | 52.83    | 51.88     |
| <b>B1s</b>  | 29.91    | 29.27     |
| <b>N1s</b>  | -        | 2.86      |

**Table S2** Table summarizing FL lifetime parameters of BBCNs/PNA ensemble.

| Sample                | $\tau_1/$ ns ( $A_1/\%$ ) | $\tau_2/$ ns ( $A_2/\%$ ) | $\tau_3/$ ns ( $A_3/\%$ ) | $\tau^a_{ave}$ , ns |
|-----------------------|---------------------------|---------------------------|---------------------------|---------------------|
| BBCNs                 | 1.91 (32.74)              | 4.88 (36.54)              | 14.26 (30.72)             | 6.79                |
| BBCNs/50 $\mu$ M PNA  | 1.73 (29.27)              | 4.36 (39.33)              | 13.19 (31.40)             | 6.36                |
| BBCNs/100 $\mu$ M PNA | 1.65 (31.81)              | 4.57 (39.86)              | 12.50 (28.34)             | 5.89                |

<sup>a</sup> The average lifetime is calculated according to  $\tau_{ave} = \Sigma A_i \tau_i$ .

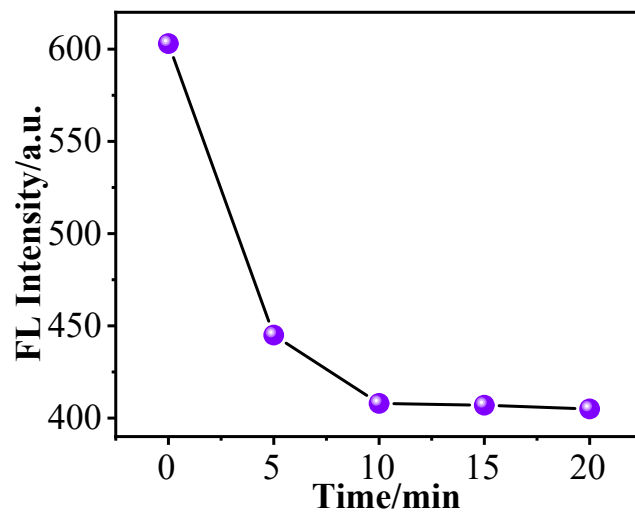

**Fig. S1** FL intensities at 405 nm of the BBCNs after adding the PNA (50  $\mu$ M) at various standing times.

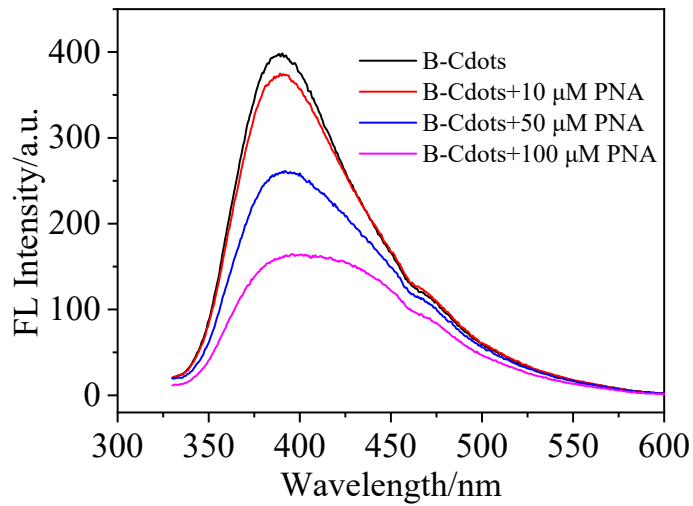

**Fig. S2** FL spectra of B-Cdots synthesized by phenylboric acid precursor in the absence and presence of the PNA, respectively.

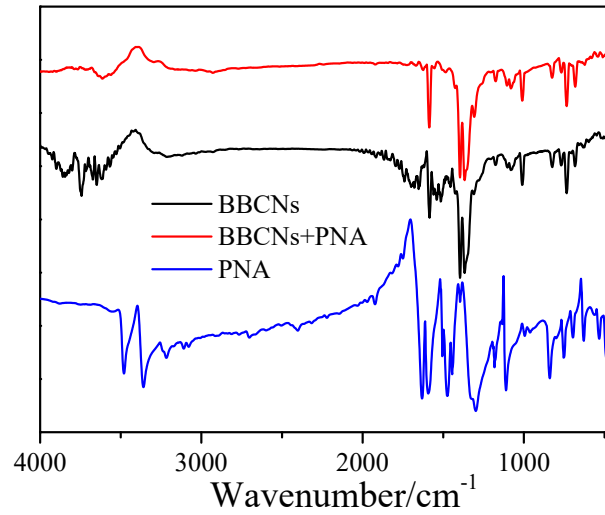

**Fig. S3** FT-IR spectra of PNA, BBCNs and a mixture of BBCNs and PNA.

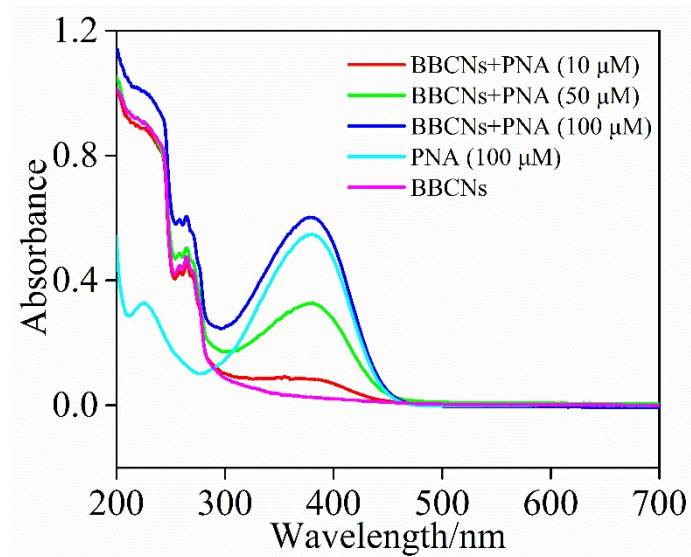

**Fig. S4** UV-vis absorption spectra of pure PNA, single BBCNs and the mixture of BBCNs and PNA with different concentrations.

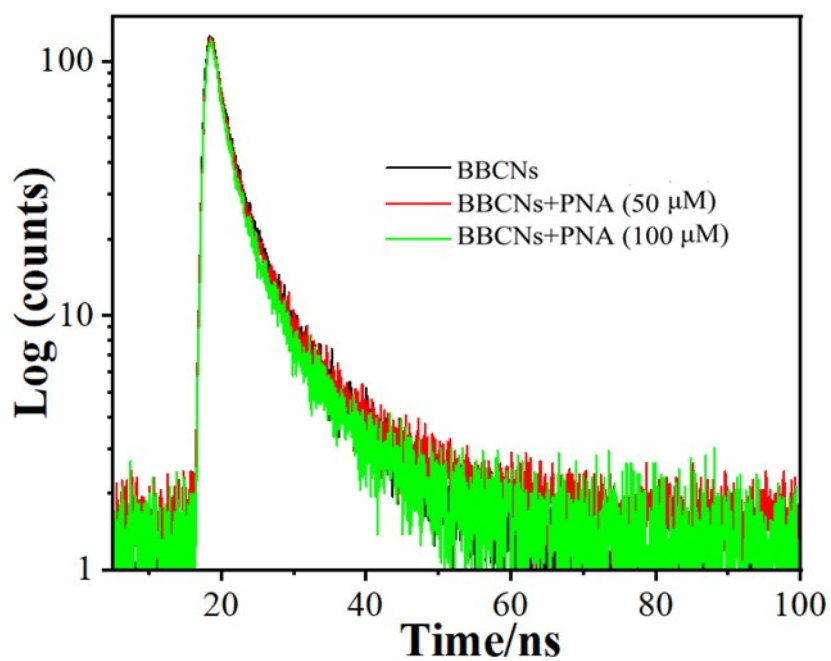

**Fig. S5** Decay of the FL of the BBCNs in the absence and presence of PNA.

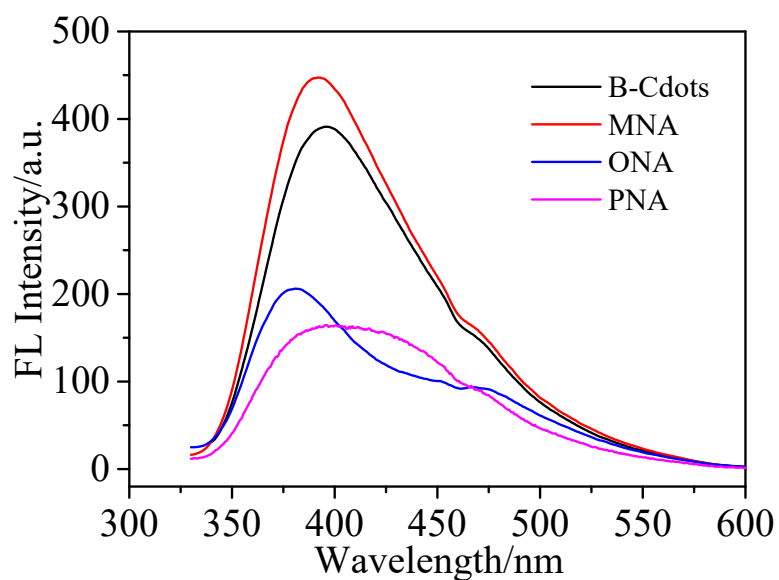

**Fig. S6** FL spectra of single B-Cdots synthesized by phenylboric acid precursor in the absence and presence of various nitroaniline isomers (100 μM).

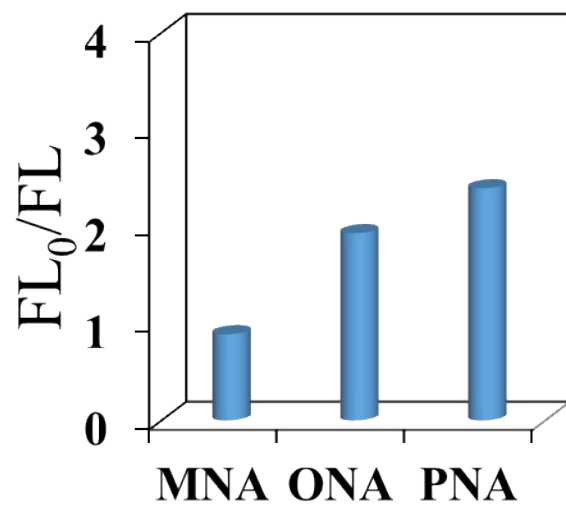

**Fig. S7** The  $[FL_0/FL]$  diagrams of B-Cdots prepared by phenylboronic acid in the presence of various nitroaniline isomers (100  $\mu$ M).
